# Supplementary material
Source: PubMed Central journal article supplement (PMC2733817)
Supplement: ddp078_1.pdf [file ddp078_1.pdf]

Supplementary Table 1: Allele frequency<sup>1</sup> (HWE Pvalue) in the study populations.

| <b>SNP</b> | <b>Search set1</b> | <b>Search set2</b> | <b>Search set3</b> | <b>MEC-White</b> | <b>MEC-Japanese</b> | <b>Seoul</b> | <b>Taiwan</b> | <b>Thai</b> |
|------------|--------------------|--------------------|--------------------|------------------|---------------------|--------------|---------------|-------------|
| rs10736303 | 0.51 (0.76)        | 0.52 (0.60)        | 0.50 (0.04)        | 0.48 (0.02)      | 0.46 (0.08)         | 0.47 (0.40)  | 0.43 (0.22)   | 0.39 (0.32) |
| rs2981578  | 0.51 (0.91)        | 0.52 (0.48)        | 0.51 (0.06)        | 0.48 (0.06)      | 0.48 (0.11)         | 0.46 (0.90)  | 0.43 (0.32)   | 0.39 (0.59) |
| rs35054928 | 0.57 (0.94)        | 0.58 (0.64)        | 0.57 (0.70)        | .                | .                   | 0.56 (0.08)  | .             | .           |
| rs2981575  | 0.58 (0.87)        | 0.59 (0.86)        | 0.58 (0.98)        | 0.58 (0.09)      | 0.63 (0.02)         | 0.57 (0.56)  | 0.56 (0.01)   | 0.52 (0.45) |
| rs2981582  | 0.59 (0.92)        | 0.60 (0.71)        | 0.59 (0.75)        | 0.59 (0.27)      | 0.73 (0.17)         | 0.68 (0.83)  | 0.67 (0.15)   | 0.64 (0.51) |

  

| <b>SNP</b> | <b>CARE-LA</b> | <b>LIFE</b> | <b>MEC-AA</b> | <b>CARE-AA Atlanta</b> | <b>CARE-AA Detroit</b> | <b>CARE-AA Philadelphia</b> | <b>CARE-AA LA</b> | <b>CARE-AA Seattle</b> |
|------------|----------------|-------------|---------------|------------------------|------------------------|-----------------------------|-------------------|------------------------|
| rs10736303 | 0.17 (0.17)    | 0.12 (0.97) | 0.17 (0.06)   | 0.17 (0.23)            | 0.13 (0.95)            | 0.11 (0.12)                 | 0.16 (1.00)       | 0.11 (0.97)            |
| rs2981578  | 0.18 (0.31)    | 0.12 (0.84) | 0.18 (0.14)   | 0.17 (0.23)            | 0.14 (0.95)            | 0.11 (0.16)                 | 0.16 (1.00)       | 0.11 (0.94)            |
| rs35054928 | 0.43 (0.44)    | 0.40 (0.90) | 0.40 (0.30)   | 0.39 (0.20)            | 0.39 (0.88)            | 0.31 (0.15)                 | 0.39 (0.83)       | 0.47 (0.54)            |
| rs2981575  | 0.46 (0.62)    | 0.45 (0.75) | 0.43 (0.19)   | 0.43 (0.83)            | 0.43 (0.19)            | 0.34 (0.24)                 | 0.44 (0.90)       | 0.47 (0.64)            |
| rs2981582  | 0.56 (0.59)    | 0.57 (0.42) | 0.54 (0.25)   | .                      | .                      | .                           | .                 | .                      |

1. Allele is the common/non-risk allele in Europeans

Supplementary Table 2: Summary of breast cancer case-control studies and SNPs used in fine-mapping work (including AA samples present in more than one study)

**a. Study Characteristics**

| Study                                                                       | Abbreviation | Number of subjects    |                 |                   | Age Range |
|-----------------------------------------------------------------------------|--------------|-----------------------|-----------------|-------------------|-----------|
|                                                                             |              | Number Invasive Cases | Number Controls | Positive FH cases |           |
| Taiwanese Breast Cancer Study                                               | TWBCS        | 921                   | 940             | 21                | 30-85     |
| IARC – Thai Breast Cancer Study                                             | TBCS         | 474                   | 390             | 16                | 17-82     |
| Multiethnic cohort (White)                                                  | MEC-W        | 425                   | 435             | 69                |           |
| Multiethnic cohort (Japanese)                                               | MEC-J        | 448                   | 394             | 77                |           |
| Studies of Epidemiology and Risk Factors in Cancer Heredity (Sets 1 and 2)  | SEARCH       | 4,470                 | 4,560           | 591               | 25-80     |
| SEARCH set 3                                                                |              | 2,301                 | 2,280           | 370               | 26-81     |
| Seoul Breast Cancer Project                                                 | SBCP         | 2,442                 | 1,780           | 175               | >=40      |
| Women's Contraceptive and Reproductive Experiences Study (African American) | CARE-AA      | 452                   | 435             | 136               | 35-64     |
| Multiethnic cohort (African American)                                       | MEC-AA       | 436                   | 653             | 166               | 45-83     |
| LIFE                                                                        | LIFE         | 140                   | 0               | 19                | 23-49     |
| CARE-LA                                                                     | CARE-LA      | 383                   | 236             | 7                 | 35-64     |
| Total after duplicate samples removed                                       |              | 12,734                | 12,024          | 626               |           |

**b. Set of SNPs utilized for fine-scale mapping**

| SNP        | Chr10 position | Study genotyped                                                           |
|------------|----------------|---------------------------------------------------------------------------|
| rs4752569  | 123321680      | SEARCH & SBCP test plates, SEARCH Sets 1,2                                |
| rs35012336 | 123323184      | SEARCH & SBCP test plates, SEARCH Sets 1,2                                |
| rs7895676  | 123323987      | SEARCH, SBCP, CARE-AA test plates                                         |
| rs10736303 | 123324447      | all studies                                                               |
| rs11200014 | 123324920      | SEARCH & SBCP test plates, MEC-J, MEC-W, SBCP                             |
| rs2912781  | 123326484      | SEARCH, SBCP & CARE-AA test plates                                        |
| rs2912780  | 123327107      | SEARCH & SBCP test plates, SEARCH sets 1&2, MEC-J, MEC-W, SBCP, TWBCS     |
| rs2912778  | 123328644      | SEARCH & SBCP test plates, SEARCH set1                                    |
| rs2981578  | 123330301      | all studies                                                               |
| rs35054928 | 123330423      | SEARCH, SBCP & CARE-AA test plates, SEARCH all sets, SBCP, all AA studies |
| rs4752571  | 123332557      | SEARCH & SBCP test plates, all Asian studies                              |
| rs2981575  | 123336106      | all studies                                                               |
| rs1219642  | 123338379      | SEARCH & SBCP test plates, SEARCH sets 1&2,all Asian studies              |
| rs2912774  | 123338652      | SEARCH & SBCP test plates, SEARCH sets 1&2,all Asian studies              |
| rs2936870  | 123338892      | SEARCH & SBCP test plates, SEARCH sets 1&2,all Asian studies              |
| rs2420946  | 123341314      | SEARCH & SBCP test plates, SEARCH sets 1&2,all Asian studies              |
| rs2981582  | 123342307      | all studies except CARE-AA                                                |
| rs3135718  | 123343859      | SEARCH & SBCP test plates, all Asian studies                              |

Supplementary Table 3: Comparison of weighted and unweighted risk estimates for SNPs among CARE-AA women

| SNP        | Crude      |           | Age- and site-adj |           |            |           | Age- site- famhx-adj |           |     |           |     |           |
|------------|------------|-----------|-------------------|-----------|------------|-----------|----------------------|-----------|-----|-----------|-----|-----------|
|            | Unweighted |           | Weighted          |           | Unweighted |           | Weighted             |           |     |           |     |           |
|            | OR         | (95%CI)   | OR                | (95%CI)   | OR         | (95%CI)   | OR                   | (95%CI)   |     |           |     |           |
| rs2981578  | 1.2        | (0.9-1.5) | 1.1               | (0.8-1.5) | 1.1        | (0.9-1.5) | 1.1                  | (0.8-1.5) | 1.2 | (0.9-1.6) | 1.2 | (0.9-1.6) |
| Het        | 1.0        | (0.4-2.6) | 0.9               | (0.3-2.3) | 0.9        | (0.4-2.4) | 0.8                  | (0.3-2.2) | 1.2 | (0.4-3.6) | 1.2 | (0.4-3.5) |
| Homo Mut   | 1.2        | (0.5-3.0) | 1.0               | (0.4-2.6) | 1.1        | (0.4-2.8) | 1.0                  | (0.4-2.5) | 1.5 | (0.5-4.2) | 1.4 | (0.5-3.9) |
| rs2981575  | 1.2        | (1.0-1.4) | 1.2               | (1.0-1.5) | 1.2        | (1.0-1.4) | 1.2                  | (1.0-1.5) | 1.2 | (0.9-1.4) | 1.2 | (0.9-1.5) |
| Het        | 1.1        | (0.8-1.7) | 1.1               | (0.7-1.6) | 1.1        | (0.8-1.6) | 1.1                  | (0.7-1.6) | 1.1 | (0.8-1.6) | 1.1 | (0.7-1.6) |
| Homo Mut   | 1.4        | (0.9-2.0) | 1.4               | (0.9-2.2) | 1.4        | (0.9-2.0) | 1.4                  | (0.9-2.2) | 1.3 | (0.9-2.0) | 1.4 | (0.9-2.2) |
| rs35054928 | 1.0        | (0.9-1.3) | 1.2               | (0.9-1.4) | 1.0        | (0.9-1.3) | 1.2                  | (0.9-1.5) | 1.0 | (0.9-1.3) | 1.2 | (0.9-1.5) |
| Het        | 0.9        | (0.6-1.4) | 1.0               | (0.6-1.6) | 0.9        | (0.6-1.4) | 1.0                  | (0.6-1.6) | 0.9 | (0.6-1.4) | 1.0 | (0.6-1.6) |
| Homo Mut   | 1.0        | (0.7-1.6) | 1.3               | (0.8-2.0) | 1.0        | (0.7-1.6) | 1.3                  | (0.8-2.0) | 1.0 | (0.7-1.6) | 1.3 | (0.8-2.1) |
| rs10736303 | 1.1        | (0.9-1.5) | 1.1               | (0.8-1.5) | 1.1        | (0.9-1.5) | 1.1                  | (0.8-1.5) | 1.2 | (0.9-1.6) | 1.1 | (0.8-1.5) |
| Het        | 1.1        | (0.4-2.7) | 0.9               | (0.3-2.3) | 1.0        | (0.4-2.5) | 0.9                  | (0.3-2.3) | 1.3 | (0.4-3.7) | 1.2 | (0.4-3.6) |
| Homo Mut   | 1.2        | (0.5-3.0) | 1.0               | (0.4-2.6) | 1.1        | (0.4-2.8) | 1.0                  | (0.4-2.5) | 1.5 | (0.5-4.2) | 1.4 | (0.5-4.0) |

Supplementary Table 4: Estimated  $r^2$  for SNPs in intron 2 of *FGFR2*:

a. 95 African American women from CARE-AA

|            | rs7895676 | rs10736303 | rs2912781 | rs2912778 | rs2981578 | rs35054928 |
|------------|-----------|------------|-----------|-----------|-----------|------------|
| rs7895676  | 1.00      |            |           |           |           |            |
| rs10736303 | 0.95      | 1.00       |           |           |           |            |
| rs2912781  | 0.85      | 0.96       | 1.00      |           |           |            |
| rs2912778  | 0.91      | 1.00       | 0.96      | 1.00      |           |            |
| rs2981578  | 0.91      | 1.00       | 0.96      | 1.00      | 1.00      |            |
| rs35054928 | 0.36      | 0.38       | 0.30      | 0.37      | 0.38      | 1.00       |
| rs2981575  | 0.24      | 0.30       | 0.22      | 0.30      | 0.29      | 0.77       |

b. 80 UK women from SEARCH (lower left) and 84 Korean samples from SBCP (upper right) [1].

|            | rs7895676 | rs10736303 | rs2912781 | rs2912778 | rs2981578 | rs35054928 | rs2981575 |
|------------|-----------|------------|-----------|-----------|-----------|------------|-----------|
| rs7895676  |           | 0.90       | 0.83      | 0.93      | 0.89      | 0.63       | 0.53      |
| rs10736303 | 0.97      |            | 0.86      | 0.81      | 0.95      | 0.61       | 0.57      |
| rs2912781  | 0.95      | 0.97       |           | 0.77      | 0.79      | 0.53       | 0.49      |
| rs2912778  | 0.95      | 0.97       | 1.00      |           | 0.90      | 0.58       | 0.49      |
| rs2981578  | 0.97      | 0.95       | 0.97      | 0.97      |           | 0.64       | 0.58      |
| rs35054928 | 0.76      | 0.79       | 0.76      | 0.76      | 0.74      |            | 0.90      |
| rs2981575  | 0.85      | 0.77       | 0.74      | 0.74      | 0.73      | 0.98       |           |

Supplementary Table 5: Estimated  $D'$  for 7 SNPs in intron 2 of *FGFR2* in 95 African American women from CARE-AA.

|            | Rs7895676 | rs10736303 | rs2912781 | rs2912778 | rs2981578 | rs35054928 |
|------------|-----------|------------|-----------|-----------|-----------|------------|
| rs7895676  |           |            |           |           |           |            |
| rs10736303 | 1.00      |            |           |           |           |            |
| rs2912781  | 0.95      | 1.00       |           |           |           |            |
| rs2912778  | 1.00      | 1.00       | 1.00      |           |           |            |
| rs2981578  | 1.00      | 1.00       | 1.00      | 1.00      |           |            |
| rs35054928 | 0.93      | 1.00       | 0.93      | 1.00      | 1.00      |            |
| rs2981575  | 0.84      | 0.94       | 0.85      | 0.93      | 0.93      | 0.92       |

Supplementary Table 6: Genotype counts for each SNP

**rs10736303**

| Study        | AA control | AA case | AG control | AG case | GG control | GG case | Total |
|--------------|------------|---------|------------|---------|------------|---------|-------|
| MEC-Japanese | 98         | 92      | 183        | 205     | 109        | 144     | 831   |
| MEC-White    | 103        | 71      | 226        | 227     | 92         | 122     | 841   |
| Searchset1   | 645        | 484     | 1124       | 1104    | 491        | 589     | 4437  |
| Searchset2   | 649        | 540     | 1160       | 1079    | 456        | 565     | 4449  |
| Searchset3   | 640        | 551     | 1093       | 1117    | 534        | 627     | 4562  |
| Seoul        | 358        | 393     | 675        | 989     | 366        | 611     | 3392  |
| Taiwan       | 205        | 143     | 453        | 423     | 275        | 346     | 1845  |
| Thai         | 40         | 36      | 79         | 136     | 66         | 118     | 475   |
| CARE-AA      | 10         | 9       | 112        | 106     | 309        | 337     | 883   |
| MEC-AA       | 28         | 12      | 175        | 108     | 432        | 295     | 1050  |
| CARE-LA+LIFE | 6          | 11      | 40         | 77      | 101        | 261     | 496   |

**rs2981578**

| Study        | AA control | AA case | AG control | AG case | GG control | GG case | Total |
|--------------|------------|---------|------------|---------|------------|---------|-------|
| MEC-Japanese | 102        | 100     | 184        | 200     | 92         | 137     | 815   |
| MEC-White    | 104        | 74      | 222        | 216     | 88         | 119     | 823   |
| Searchset1   | 659        | 483     | 1115       | 1085    | 480        | 585     | 4407  |
| Searchset2   | 654        | 524     | 1149       | 1077    | 453        | 555     | 4412  |
| Searchset3   | 638        | 546     | 1081       | 1113    | 523        | 616     | 4517  |
| Seoul        | 342        | 379     | 684        | 995     | 362        | 607     | 3369  |
| Taiwan       | 206        | 131     | 435        | 427     | 268        | 341     | 1808  |
| Thai         | 73         | 52      | 166        | 205     | 115        | 183     | 794   |
| CARE-AA      | 10         | 9       | 114        | 105     | 306        | 333     | 877   |
| MEC-AA       | 27         | 14      | 185        | 105     | 408        | 281     | 1020  |
| CARE-LA+LIFE | 7          | 10      | 41         | 81      | 90         | 238     | 467   |

**rs35054928**

| Study        | -/- control | -/- case | -/C control | -/C case | CC control | CC case | Total |
|--------------|-------------|----------|-------------|----------|------------|---------|-------|
| MEC-Japanese | .           | .        | .           | .        | .          | .       | .     |
| MEC-White    | .           | .        | .           | .        | .          | .       | .     |
| Searchset1   | 806         | 617      | 1092        | 1093     | 369        | 466     | 4443  |
| Searchset2   | 804         | 666      | 1101        | 1072     | 354        | 426     | 4423  |
| Searchset3   | 771         | 652      | 1071        | 1136     | 373        | 463     | 4466  |
| Seoul        | 478         | 583      | 630         | 947      | 250        | 413     | 3301  |
| Taiwan       | .           | .        | .           | .        | .          | .       | .     |
| Thai         | .           | .        | .           | .        | .          | .       | .     |
| CARE-AA      | 61          | 64       | 212         | 208      | 155        | 169     | 869   |
| MEC-AA       | 108         | 67       | 295         | 191      | 236        | 150     | 1047  |
| CARE-LA+LIFE | 33          | 35       | 63          | 98       | 48         | 79      | 356   |

**rs2981575**

| Study        | AA control | AA case | AG control | AG case | GG control | GG case | Total |
|--------------|------------|---------|------------|---------|------------|---------|-------|
| MEC-Japanese | 176        | 156     | 147        | 192     | 51         | 73      | 795   |
| MEC-White    | 158        | 111     | 213        | 222     | 54         | 84      | 842   |
| Searchset1   | 809        | 635     | 1061       | 1044    | 338        | 443     | 4330  |
| Searchset2   | 816        | 684     | 1038       | 1051    | 320        | 399     | 4308  |
| Searchset3   | 807        | 698     | 1093       | 1136    | 369        | 455     | 4558  |
| Seoul        | 429        | 557     | 581        | 865     | 214        | 340     | 2986  |
| Taiwan       | 338        | 261     | 413        | 421     | 158        | 212     | 1803  |
| Thai         | 110        | 106     | 162        | 223     | 71         | 120     | 792   |
| CARE-AA      | 77         | 68      | 224        | 227     | 129        | 155     | 880   |

|              |     |    |     |     |     |     |      |
|--------------|-----|----|-----|-----|-----|-----|------|
| MEC-AA       | 126 | 81 | 307 | 186 | 205 | 141 | 1046 |
| CARE-LA+LIFE | 38  | 73 | 68  | 167 | 42  | 113 | 501  |

**rs2981582**

| Study        | GG control | GG case | GA control | GA case | AA control | AA case | Total |
|--------------|------------|---------|------------|---------|------------|---------|-------|
| MEC-Japanese | 222        | 225     | 136        | 171     | 29         | 38      | 821   |
| MEC-White    | 168        | 113     | 204        | 210     | 51         | 79      | 825   |
| Searchset1   | 869        | 670     | 1059       | 1066    | 327        | 420     | 4411  |
| Searchset2   | 838        | 726     | 1054       | 1022    | 306        | 399     | 4345  |
| Searchset3   | 837        | 738     | 1088       | 1119    | 351        | 437     | 4570  |
| Seoul        | 690        | 921     | 618        | 886     | 132        | 213     | 3460  |
| Taiwan       | 455        | 371     | 365        | 402     | 90         | 114     | 1797  |
| Thai         | 174        | 172     | 158        | 220     | 36         | 78      | 838   |
| CARE-AA      |            |         |            |         |            |         |       |
| MEC-AA       | 192        | 128     | 314        | 197     | 141        | 94      | 1066  |
| CARE-LA+LIFE | 53         | 110     | 65         | 161     | 29         | 75      | 493   |
